# Supplementary material for: Maternal Haplotypes in DHFR Promoter and MTHFR Gene in Tuning Childhood Acute Lymphoblastic Leukemia Onset-Latency: Genetic/Epigenetic Mother/Child Dyad Study (GEMCDS)
Source: PubMed Central journal article supplement (PMC6770441; doi:10.3390/genes10090634), 2019-08-22
Supplement: genes-10-00634-s001.pdf [file genes-10-00634-s001.pdf]

Supplementary Material

Table S1. Primer sequences, restriction-product characteristics and PCR conditions

| Gene variants                           | Oligo sequence                              | Amplicon size (bp) | Restriction enzyme      | Allele detected (bp)        | PCR thermal profile                                              |
|-----------------------------------------|---------------------------------------------|--------------------|-------------------------|-----------------------------|------------------------------------------------------------------|
| <b><i>DHFR ins/del</i> (rs70991108)</b> |                                             |                    |                         |                             |                                                                  |
| Fw                                      | 5'-CCACGGTTCGGGGTACCTGGG-3'                 | 113/94             | --                      | (W) 113<br>(D) 94           | 94°C/5'; 94°C/55", 60°C/55",<br>72°C/25"; 72°C/5'<br>(35 cycles) |
| Fw                                      | 5'-ACGGTCGGGGTGGCCGACTC-3'                  |                    |                         |                             |                                                                  |
| Rv                                      | 5'-AAAAGGGGAATCCAGTCGG-3'                   |                    |                         |                             |                                                                  |
| Fw Py                                   | 5'-CAAGAACGGGGACCTGCC-3'                    | 133/114            | --                      | --                          | 94°C/5'; 94°C/30", 60°C/30",<br>72°C/30"; 72°C/5'<br>(35 cycles) |
| Rv Py                                   | 5'-ATCCTCTCGCCGGGAGTC-3' [Bio]              |                    |                         |                             |                                                                  |
| Sq                                      | 5'-GCCCACGGTTCGGGGT-3'                      |                    |                         |                             |                                                                  |
| <b><i>MTHFR C677T</i> (rs1801133)</b>   |                                             |                    |                         |                             |                                                                  |
| Fw Py                                   | 5'-ATCCCTATTGGCAGGTTACCC-3'                 | 121                | --                      | --                          | 94°C/5'; 94°C/30", 54°C/30",<br>72°C/60"; 72°C/5'<br>(35 cycles) |
| Rv Py                                   | 5'-AAAGAAAAGCTGCGTGATGATGA-3' [Bio]         |                    |                         |                             |                                                                  |
| Sq                                      | 5'-GAAGGTGTCTGCGGG-3'                       |                    |                         |                             |                                                                  |
| Fw Rst                                  | 5'-CGAAGCAGGGAGCTTTGAG <u><b>T</b></u> C-3' | 233                | <i>Hinfl</i><br>(37°C)  | (C) 216+17<br>(T) 176+40+17 | 94°C/5'; 94°C/45", 65°C/60",<br>72°C/90"; 72°C/5'<br>(30 cycles) |
| Rv Rst                                  | 5'-AGGACGGTGCGGTGAGAGTG-3'                  |                    |                         |                             |                                                                  |
| <b><i>MTHFR A1298C</i> (rs1801131)</b>  |                                             |                    |                         |                             |                                                                  |
| Fw Py                                   | 5'-CTGCCCTCTGTCAGGAGTGT-3'                  | 222                | --                      | --                          | 94°C/5'; 94°C/30", 57°C/15",<br>72°C/45"; 72°C/5'<br>(35 cycles) |
| Rv Py                                   | 5'-CATCCGGTTTGGTTCTCC-3' [Bio]              |                    |                         |                             |                                                                  |
| Sq                                      | 5'-GGAGCTGACCAGTGAA-3'                      |                    |                         |                             |                                                                  |
| Fw Rst                                  | 5'-GGGAGGAGCTGACCAGT <u><b>G</b></u> CAG-3' | 138                | <i>Fnu4HI</i><br>(37°C) | (A) 138<br>(C) 19+119       | 94°C/5'; 94°C/30", 59°C/13",<br>72°C/17"; 72°C/5'<br>(30 cycles) |
| Rv Rst                                  | 5'-GGGGTCAGGCCAGGGGCAG-3'                   |                    |                         |                             |                                                                  |

Fw and Rv, indicate the forward and reverse primer respectively; the underlined bold letter in the oligo sequence indicates the mutagenized forward primer; Sq, indicates the specific sequencing primer; Rst and Py, indicate restriction and Pyrosequencing technique respectively; [Bio], indicates the biotinylated primer; W and D, indicate the common and rare (polymorphic) *DHFR* allele respectively; C and T, indicate the common and rare (polymorphic) *MTHFR* 677 allele respectively; A and C, indicate the common and rare (polymorphic) *MTHFR* 1298 allele respectively

**Table S2.** Age of ALL onset according to different combinations of children and mothers genotype

| Genotype Groups (n=169)                     | DHFR ins/del (children)              |                                      |                                      | P <sup>a</sup><br>P <sup>b</sup> | Genotype Groups (n=169)                     | MTHFR 677 (children)                 |                                      |                                      | P <sup>a</sup><br>P <sup>b</sup>   | Genotype Groups (n=169)                     | MTHFR 1298 (children)                |                                       |                                      | P <sup>a</sup><br>P <sup>b</sup>     |                                       |                                     |          |
|---------------------------------------------|--------------------------------------|--------------------------------------|--------------------------------------|----------------------------------|---------------------------------------------|--------------------------------------|--------------------------------------|--------------------------------------|------------------------------------|---------------------------------------------|--------------------------------------|---------------------------------------|--------------------------------------|--------------------------------------|---------------------------------------|-------------------------------------|----------|
|                                             | WW<br>mean±SD<br>median (n)<br>range | WD<br>mean±SD<br>median (n)<br>range | DD<br>mean±SD<br>median (n)<br>range |                                  |                                             | CC<br>mean±SD<br>median (n)<br>range | CT<br>mean±SD<br>median (n)<br>range | TT<br>mean±SD<br>median (n)<br>range |                                    |                                             | AA<br>mean±SD<br>median (n)<br>range | AC<br>mean±SD<br>median (n)<br>range  | CC<br>mean±SD<br>median (n)<br>range |                                      |                                       |                                     |          |
| <b>Onset in children with that genotype</b> | 4.8±3.6<br>3.78 (69)<br>0.003-16.6   | 6.4±4.5<br>4.82 (78)<br>0.04-16.8    | 7.2±4.7<br>5.44 (22)<br>2.1-16.9     | <b>0.007</b><br><b>0.002</b>     | <b>Onset in children with that genotype</b> | 5.8±4.3<br>4.10 (50)<br>0.7-16.7     | 6.2±4.7<br>4.04 (82)<br>0.003-16.9   | 5.2±2.8<br>4.4 (37)<br>0.8-11.6      | ns                                 | <b>Onset in children with that genotype</b> | 5.79±4.21<br>4.07 (71)<br>0.77-16.92 | 5.76±4.25<br>4.21 (85)<br>0.003-16.82 | 7.05±4.64<br>4.09 (13)<br>1.85-15.13 | ns<br>ns                             |                                       |                                     |          |
| <b>Mothers (n=169)</b>                      |                                      |                                      |                                      |                                  | <b>Mothers (n=169)</b>                      |                                      |                                      |                                      |                                    | <b>Mothers (n=169)</b>                      |                                      |                                       |                                      |                                      |                                       |                                     |          |
| <b>DHFR ins/del</b>                         | WW (n=62)                            | 5.2±3.8<br>3.92 (42)<br>1.3-16.6     | 7.3±5.5<br>4.18 (20)<br>6.1-16.5     | -                                | <b>0.04</b>                                 | <b>MTHFR 677</b>                     | CC (n=46)                            | 6.8±4.9<br>4.47 (26)<br>1.9-16.8     | 7.2±5.9<br>3.72 (20)<br>0.2-16.9   | -                                           | ns                                   | <b>DHFR ins/del</b>                   | WW (n=62)                            | 5.38±4.17<br>3.76 (28)<br>1.32-16.64 | 6.07±4.66<br>4.10 (28)<br>0.66-16.5   | 7.25±5.57<br>5.41 (6)<br>1.85-15.13 | ns<br>ns |
|                                             | WD (n=81)                            | 4.2±3.1<br>3.78 (27)<br>0.003-15.9   | 6.4±4.2<br>5.49 (41)<br>0.07-16.8    | 7.8±4.9<br>5.68 (13)<br>3.2-16.9 | <b>0.005</b><br><b>0.004</b>                |                                      | CT (n=89)                            | 4.8±3.3<br>3.24 (24)<br>0.7-12.4     | 5.9±4.6<br>4.05 (46)<br>0.07-16.8  | 5.1±2.6<br>5.52 (19)<br>1.5-11.6            | ns                                   |                                       | WD (n=81)                            | 6.28±4.22<br>4.24 (32)<br>2.37-16.92 | 5.53±4.04<br>4.51 (43)<br>0.003-16.82 | 6.54±4.43<br>4.05 (6)<br>3.15-12.43 | ns<br>ns |
|                                             | DD (n=26)                            | -                                    | 5.5±4.2<br>3.40 (17)<br>0.4-15.1     | 6.4±4.6<br>5.21 (9)<br>2.1-14.3  | ns                                          |                                      | TT (n=34)                            | -                                    | 5.6±3.6<br>4.39 (16)<br>0.003-11.7 | 5.3±3.1<br>4.05 (18)<br>0.8-11.1            | ns                                   |                                       | DD (n=26)                            | 5.4±4.5<br>3.4 (11)<br>0.77-15.1     | 5.84±4.27<br>3.56 (14)<br>2.03-14.28  | 8.94 (1)                            | -        |
| <b>MTHFR 677</b>                            | CC (n=46)                            | 6.05±4.6<br>4.15 (20)<br>0.17-15.9   | 7.15±5.4<br>4.66 (21)<br>1.3-16.5    | 10.1±6.7<br>10.3 (5)<br>3.1-16.9 | 0.061<br>0.08                               | <b>DHFR ins/del</b>                  | WW (n=62)                            | 5.9±4.8<br>3.68 (22)<br>0.7-16.5     | 6.3±5.1<br>3.75 (27)<br>1.3-16.6   | 5.0±2.4<br>6.06 (13)<br>1.4-9.5             | ns                                   | <b>MTHFR 677</b>                      | CC (n=46)                            | 8.72±5.64<br>7.86 (14)<br>1.82-16.91 | 5.97±4.96<br>3.77 (26)<br>0.17-16.5   | 7.37±5.46<br>5.84 (6)<br>1.85-15.13 | ns<br>ns |
|                                             | CT (n=89)                            | 4.17±2.9<br>3.36 (34)<br>1.3-16.6    | 6.3±4.4<br>5.09 (41)<br>0.07-16.8    | 6.1±3.8<br>4.79 (14)<br>2.1-16.3 | <b>0.02</b><br><b>0.007</b>                 |                                      | WD (n=81)                            | 6.0±3.9<br>4.77 (22)<br>2.3-16.7     | 6.0±4.7<br>4.04 (42)<br>0.003-16.9 | 5.6±2.8<br>4.4 (17)<br>2.8-11.1             | ns                                   |                                       | CT (n=89)                            | 4.91±3.76<br>3.54 (34)<br>1.32-16.65 | 5.64±4.01<br>4.38 (48)<br>0.068-16.82 | 6.76±4.25<br>4.01 (7)<br>3.16-12.44 | ns<br>ns |
|                                             | TT (n=34)                            | 4.6±3.0<br>3.78 (15)<br>0.003-11.6   | 5.8±3.4<br>4.3 (16)<br>0.8-11.7      | 7.6±3.6<br>7.7 (3)<br>3.7-11.1   | 0.07<br>ns                                  |                                      | DD (n=26)                            | 5.0±3.8<br>2.72 (6)<br>2.14-10.7     | 6.8±4.7<br>5.86 (13)<br>2.0-15.1   | 4.5±3.8<br>3.05 (7)<br>0.8-11.6             | ns                                   |                                       | TT (n=34)                            | 5.99±3.08<br>4.07 (23)<br>0.77-11.64 | 5.78±3.81<br>4.70 (11)<br>0.003-11.67 | -                                   | -        |
| <b>MTHFR 1298</b>                           | AA (n=88)                            | 4.79±3.6<br>3.7 (38)<br>0.003-16.6   | 6.0±3.8<br>5.2 (36)<br>0.77-15.1     | 8.4±4.8<br>6.7 (14)<br>3.05-16.9 | <b>0.0029</b><br><b>0.0166</b>              | <b>MTHFR 1298</b>                    | AA (n=88)                            | 6.7±4.2<br>5.1 (18)<br>2.3-16.7      | 6.2±4.7<br>3.9 (43)<br>0.003-16.9  | 4.75±2.5<br>4.1 (27)<br>0.77-11.1           | <b>0.03</b><br><b>0.04</b>           | <b>MTHFR 1298</b>                     | AA (n=88)                            | 5.9±4.1<br>4.5 (53)<br>0.77-16.9     | 5.8±4.0<br>4.2 (35)<br>0.003-14.7     | -                                   | -        |
|                                             | AC (n=67)                            | 4.27±2.8<br>3.7 (26)<br>0.17-14.65   | 7.05±5.1<br>5.1 (35)<br>0.07-16.8    | 5.8±4.1<br>4.6 (6)<br>2.1-13.1   | ns<br><b>0.009</b>                          |                                      | AC (n=67)                            | 4.8±4.1<br>3.2 (24)<br>0.66-16.5     | 6.46±4.8<br>4.51 (33)<br>0.07-16.8 | 6.4±3.2<br>6.4 (10)<br>1.3-11.6             | ns<br>ns                             |                                       | AC (n=67)                            | 5.5±4.5<br>3.3 (18)<br>1.8-15.1      | 5.9±4.4<br>4.4 (40)<br>0.07-16.8      | 6.33±4.58<br>4.01 (9)<br>1.85-12.65 | ns<br>ns |
|                                             | CC (n=14)                            | 7.9±5.1<br>7.5 (5)<br>2.3-15.9       | 5.5±4.9<br>2.9 (7)<br>1.23-15.1      | 2.3±0.2<br>2.3 (2)<br>2.7-3.1    | ns<br>ns                                    |                                      | CC (n=14)                            | 6.74±4.3<br>6.1 (8)<br>2.7-15.1      | 4.98±5.4<br>2.99 (6)<br>1.29-15.9  | -                                           | -                                    |                                       | CC (n=14)                            | -                                    | 4.9±4.4<br>2.99 (10)<br>1.29-15.93    | 6.65±5.03<br>8.26 (4)<br>2.93-15.13 | ns<br>ns |

P<sup>a</sup>, indicates comparisons performed between opposite genotype conditions (i.e. DHFR WW versus DD; MTHFR 677 CC versus TT and MTHFR 1298 AA versus CC); P<sup>b</sup>, indicates comparisons performed between DHFR D-allele carriers versus WW-homozygotes (dominant model) and MTHFR 677 TT- or MTHFR 1298 CC-homozygotes versus the remaining genotypes (recessive model).

Table S3. *DHFR/MTHFR* genotype distribution stratified by ALL onset-age quartiles

| Age of onset quartiles                 |                        | 1 <sup>st</sup> | 2 <sup>nd</sup> | 3 <sup>rd</sup> | 4 <sup>th</sup> | 2 <sup>nd</sup> + 3 <sup>rd</sup> + 4 <sup>th</sup> |           |
|----------------------------------------|------------------------|-----------------|-----------------|-----------------|-----------------|-----------------------------------------------------|-----------|
| Genotype                               |                        | % (n)           | % (n)           | % (n)           | % (n)           | % (n)                                               |           |
| Children<br>whole<br>cohort<br>(n=235) | <i>DHFR</i><br>ins/del | WW              | 49.2 (29)       | 49.6 (23)       | 40.7 (24)       | 25.4 (15)                                           | 35.2 (62) |
|                                        |                        | WD              | 42.4 (25)       | 33.1 (25)       | 47.4 (28)       | 50.9 (30)                                           | 47.2 (83) |
|                                        |                        | DD              | 8.4 (5)         | 17.3 (10)       | 11.9 (7)        | 23.7 (14)                                           | 17.6 (31) |
|                                        | <i>MTHFR</i><br>677    | CC              | 39.0 (23)       | 31.0 (18)       | 30.5 (18)       | 44.1 (26)                                           | 35.2 (62) |
|                                        |                        | CT              | 47.4 (28)       | 43.1 (25)       | 42.4 (25)       | 44.1 (26)                                           | 43.2 (76) |
|                                        |                        | TT              | 13.6 (8)        | 25.9 (15)       | 27.1 (16)       | 11.8 (7)                                            | 21.6 (38) |
|                                        | <i>MTHFR</i><br>1298   | AA              | 44.1 (26)       | 43.1 (25)       | 42.4 (25)       | 35.6 (21)                                           | 40.3 (71) |
|                                        |                        | AC              | 50.8 (30)       | 41.4 (24)       | 52.5 (31)       | 42.4 (25)                                           | 45.5 (80) |
|                                        |                        | CC              | 5.1 (3)         | 15.5 (9)        | 5.1 (3)         | 22.0 (13)                                           | 14.2 (25) |
| Children<br>dyads<br>(n=169)           | <i>DHFR</i><br>ins/del | WW              | 50.0 (21)       | 45.2 (19)       | 40.5 (17)       | 27.9 (12)                                           | 37.8 (48) |
|                                        |                        | WD              | 45.2 (19)       | 38.1 (16)       | 45.2 (19)       | 55.8 (24)                                           | 46.5 (59) |
|                                        |                        | DD              | 4.8 (2)         | 16.7 (7)        | 14.3 (6)        | 16.3 (7)                                            | 15.7 (20) |
|                                        | <i>MTHFR</i><br>677    | CC              | 33.3 (14)       | 23.8 (10)       | 31.0 (13)       | 30.2 (13)                                           | 28.4 (36) |
|                                        |                        | CT              | 50.0 (21)       | 52.4 (22)       | 35.7 (15)       | 55.8 (24)                                           | 48.0 (61) |
|                                        |                        | TT              | 16.7 (7)        | 23.8 (10)       | 33.3 (14)       | 14.0 (6)                                            | 23.6 (30) |
|                                        | <i>MTHFR</i><br>1298   | AA              | 42.9 (18)       | 45.2 (19)       | 40.5 (17)       | 39.5 (17)                                           | 41.7 (53) |
|                                        |                        | AC              | 54.8 (23)       | 42.9 (18)       | 54.8 (23)       | 48.8 (21)                                           | 48.8 (62) |
|                                        |                        | CC              | 2.3 (1)         | 11.9 (5)        | 4.7 (2)         | 11.7 (5)                                            | 9.5 (12)  |
| Mothers<br>(n=169)                     | <i>DHFR</i><br>ins/del | WW              | 40.5 (17)       | 35.7 (15)       | 31.0 (13)       | 39.5 (17)                                           | 35.4 (45) |
|                                        |                        | WD              | 35.7 (15)       | 54.8 (23)       | 54.8 (23)       | 46.5 (20)                                           | 52.0 (66) |
|                                        |                        | DD              | 23.8 (10)       | 9.5 (4)         | 14.2 (6)        | 14.0 (6)                                            | 12.6 (16) |
|                                        | <i>MTHFR</i><br>677    | CC              | 23.8 (10)       | 33.3 (14)       | 21.4 (9)        | 37.2 (16)                                           | 30.7 (39) |
|                                        |                        | CT              | 61.9 (26)       | 45.3 (19)       | 61.9 (26)       | 41.9 (18)                                           | 49.6 (63) |
|                                        |                        | TT              | 14.3 (6)        | 21.4 (9)        | 16.7 (7)        | 20.9 (9)                                            | 19.7 (25) |
|                                        | <i>MTHFR</i><br>1298   | AA              | 50.0 (21)       | 50.0 (21)       | 57.1 (24)       | 51.2 (22)                                           | 52.8 (67) |
|                                        |                        | AC              | 42.9 (18)       | 38.1 (16)       | 38.1 (16)       | 39.5 (17)                                           | 38.6 (49) |
|                                        |                        | CC              | 7.1 (3)         | 11.9 (5)        | 4.8 (2)         | 9.3 (4)                                             | 8.6 (11)  |

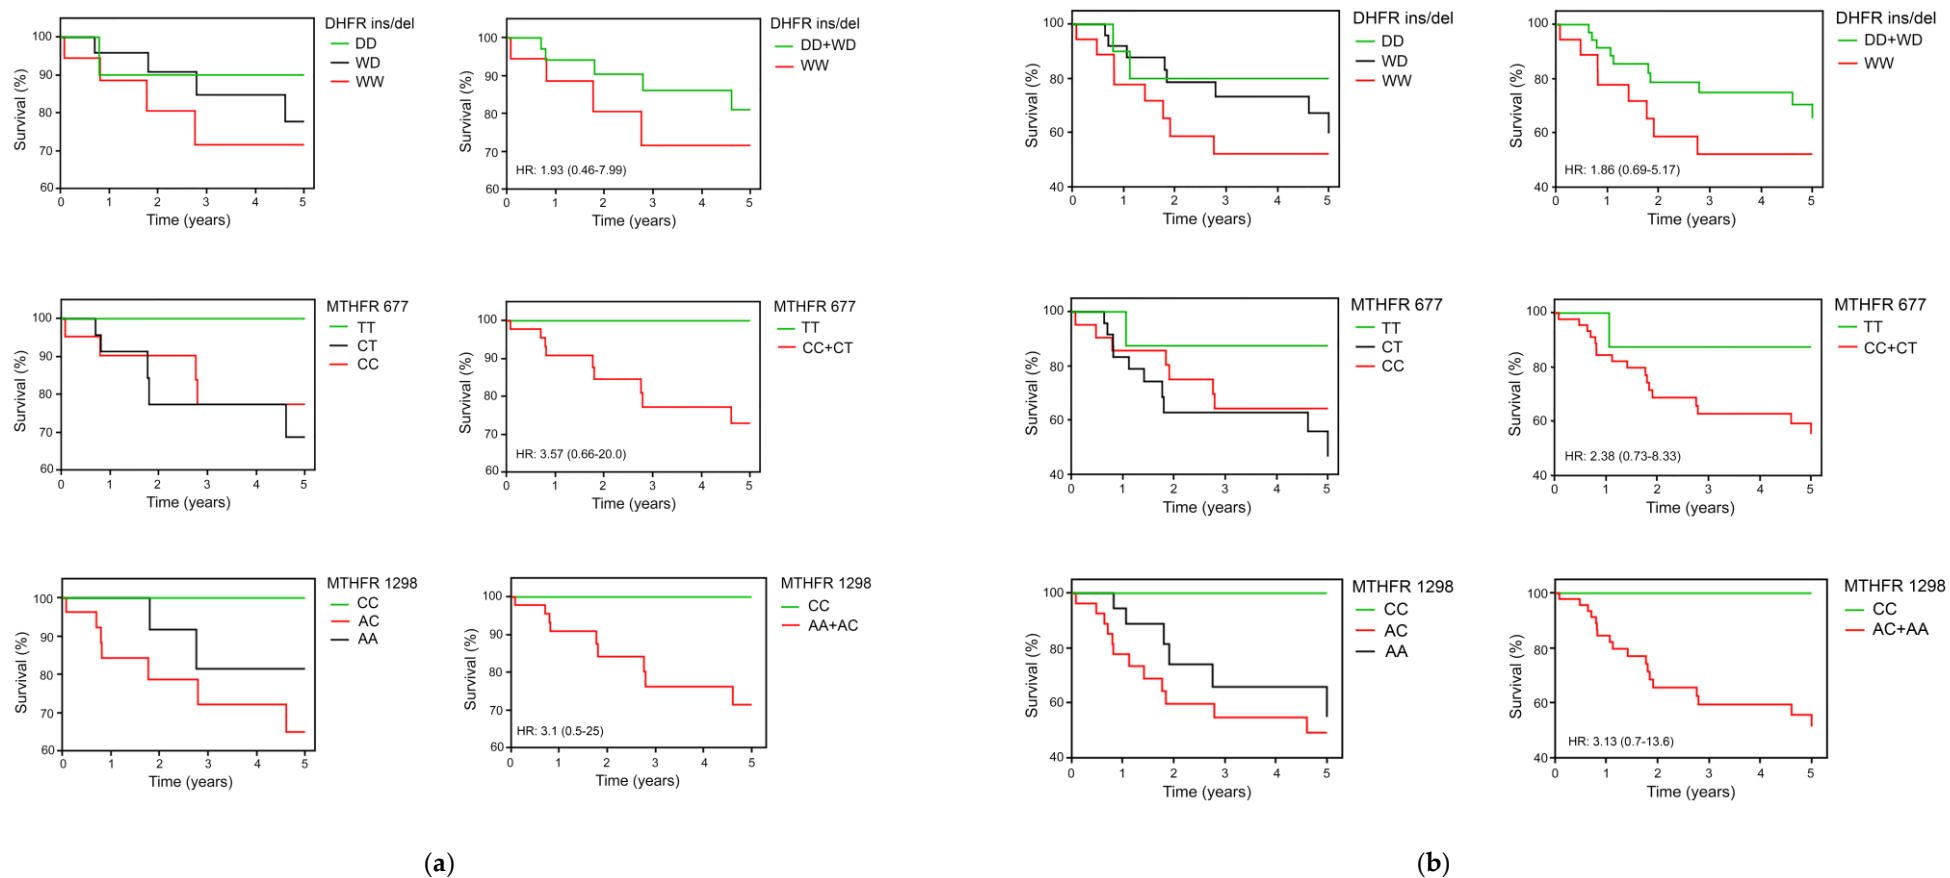

**Figure S1.** Event-free survival (EFS) among high-risk patients at 5-years survey in patients according to different *DHFR*/*MTHFR* variants. EFS curves are provided for each genotype of indicated gene variants. In **A**, EFS according to *DHFR* (**upper panels**) and *MTHFR* (**lower panels**). In **B**, EFS including prednisone response according to *DHFR* (**upper panels**) and *MTHFR* (**lower panels**). Associated HR with 95% CI are indicated. EFS: Event-free survival; HR: Hazard risk.
